# Supplementary material for: Integrated chromatin and transcriptomic profiling of patient-derived colon cancer organoids identifies personalized drug targets to overcome oxaliplatin resistance
Source: PubMed Central journal article supplement — Genes Dis. 2019 Oct 29;8(2):203–14. doi: 10.1016/j.gendis.2019.10.012 (PMC8099686; doi:10.1016/j.gendis.2019.10.012), 2019-10-29

## **Supplemental Figures**

### **Figure S1**

#### **Patient-derived organoids responses to oxaliplatin.**

(A) Representative images from CRC240, CRC159, and CRC344 organoids treated with DMSO or oxaliplatin (20  $\mu$ M) for 6 days. Scale bar = 400  $\mu$ m.

### **Figure S2**

#### **Transcriptomic and chromatin accessibility signatures of oxaliplatin treatment cells and parental cells.**

(A) Left: boxplots showing the global distribution of normalized read counts in triplicates of three CRC organoids with oxaliplatin or DMSO treatments. Right: principal component analysis (PCA) of all samples profiled in RNA-Seq. Samples from different patients are presented in different shapes, and treatments are color-coded (red: samples treated with oxaliplatin, green: samples treated with DMSO).

(B) Volcano plot showing differential expressions of genes in organoids with oxaliplatin treatment compared to control (DMSO) organoids in CRC240, CRC159, and CRC344 respectively. Red and blue points represent the genes with significantly increased ( $FDR < 0.05$ ,  $\log_2FC > 1$ ) and decreased expression, ( $FDR < 0.05$ ,  $\log_2FC < -1$ ) respectively, post-oxaliplatin treatment

(C) Heatmaps of ATAC-Seq signals covers genomic regions  $\pm$  1kb across the TSS of genes showing open chromatin accessibility in genome-wide scale. Color map shows the intensity of ATAC-Seq signals.

(D) MA plot of log<sub>2</sub> fold change versus mean peaks signal showing ATAC-seq differential peaks in organoids with oxaliplatin treatment compared to control (DMSO) organoids in CRC240, CRC159, and CRC344, respectively. ATAC-seq peaks that display significant increases post-treatment (p.val < 0.05, log<sub>2</sub>FC>1) are shown in red color, while significantly decreased peaks (p.val < 0.05, log<sub>2</sub>FC<-1) are shown in blue.

### Figure S3

#### **FGFR1 and OXTR are upregulated in CRC oxaliplatin resistant organoids.**

(A) Left: RT-qPCR showed mRNA expression of FGFR1 in three cancer organoids with control (DMSO) and oxaliplatin treatment. Right: mRNA expression of OXTR in FGFR1 in three cancer organoids with control (DMSO) and oxaliplatin treatment. Organoids were exposed to the IC<sub>50</sub> concentration of oxaliplatin. Expression levels are given relative to the housekeeping gene GAPDH. Data were mean ± SEM (n=3) and the statistical significance was assessed by unpaired two-tailed student's *t*-test. \*p<0.05; \*\*\*p<0.001; n.s., not significant. (B) ATAC-Seq peaks associated with FGFR1 and OXTR in CRC240, CRC159, and CRC344 organoids. The peaks were visualized using UCSC genome browser, and gray dash lines indicating the regions of differential peaks identified in CRC240 organoids. Only CRC240 shows significantly increase of ATAC-Seq signal in the peak regions after oxaliplatin treatment (p.val < 0.05). (C) Normalized read counts of FGFR1 and OXTR from RNASeq. Only CRC240 shows significantly upregulated expressions of FGFR1 and OXTR (p.val < 0.05, log<sub>2</sub>FC > 1 ) (D) Bright-field image of CRC119 organoid. Scale bar = 400 μm. (E) Dose-response curve of oxaliplatin treatment in CRC119 organoids. Organoids were exposed to oxaliplatin for 6 days, and cell viability was determined by CellTiter-Glo 3D cell

viability assay. The IC<sub>50</sub> values were calculated by a nonlinear regression model in GraphPad Prism. Error bars represents the standard error of the mean.

(F) Protein expression was assessed by western blot using antibodies of FGFR1, phospho-FGFR1, FGFR2, FGFR3, FGFR4, OXTR, and beta-tubulin in CRC119 with DMSO or oxaliplatin treatment .

#### **Figure S4**

##### **Inhibition of FGFR1/OXTR is active against CRC240 organoids.**

(A) Dose-response curve of CRC240 treated with PD166866 or L368,899. Cell viability was measured on day 7 using CellTiter Glo 3D cell viability assay. The IC<sub>50</sub> values were calculated by a nonlinear regression model in GraphPad Prism.

(B) CRC159, CRC344, and CRC119 organoids were treated with IC<sub>50</sub> values of oxaliplatin, PD166866, L368,899 or a combination of two agents. Cell viability assay was performed on day 7 and viability values are shown in relation to control (DMSO).

(C) Left: Combination index (CI) values for CRC240 organoids treated with PD and OXA in combination at doses of 8.5, 17, 34, 68, and 136  $\mu$ M (PD), and 32, 64, 128, 255, and 510  $\mu$ M (OXA). Right: Combination Index (CI) values for CRC240 organoids treated with L368 and OXA in combination at doses of 8, 16, 32, 64, and 128  $\mu$ M (L368) and 32, 64, 128, 255, 510  $\mu$ M (OXA). CI values  $\leq 0.9$  indicate synergism, a CI value  $>0.9$  and  $<1.1$  indicates an additive effect, and CI values  $\geq 1.1$  indicate antagonism. Combination index (CI) values calculated from data of viability assay using CompuSyn software.

#### **Figure S5**

**Predicted transcriptional factors binding sites within FGFR1 and OXTR peaks.**

Left: Venn diagram showing 8 TFs shared by peaks in both genes, 4 TFs unique within FGFR1 peaks and 8 TFs unique within OXTR peaks. Right: list of shared and unique TFs within FGFR1 and OXTR peaks.

**Figure S6**

**Binding motif analysis of predicted binding transcriptional factors.**

Binding motifs of TFs predicted in Figure S5. Only the TFs with available binding motifs in MotifMaps are shown.

Figure S1

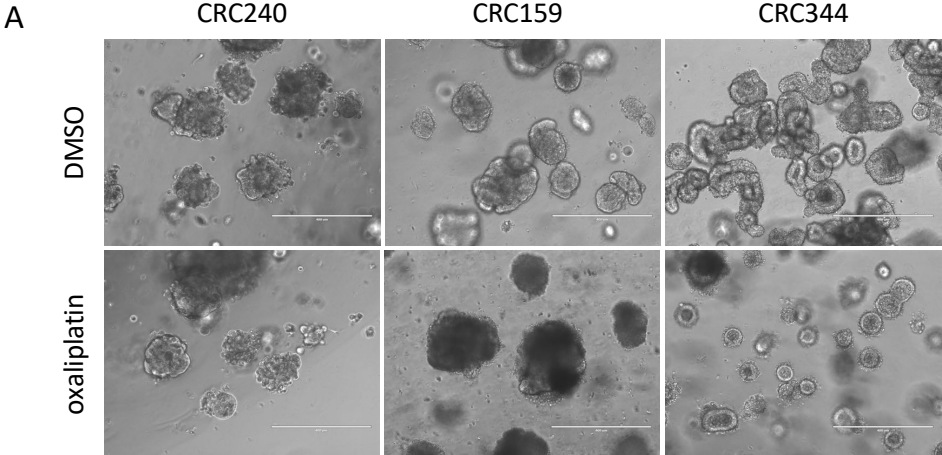

Figure S2

A

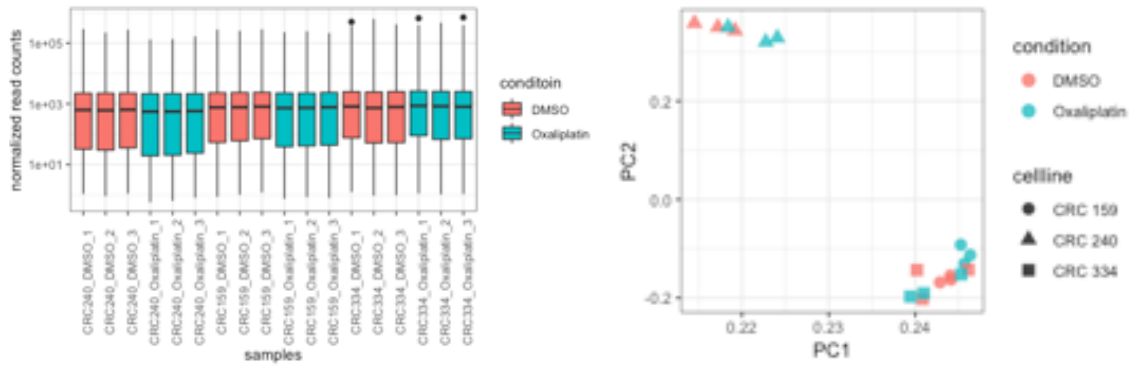

B

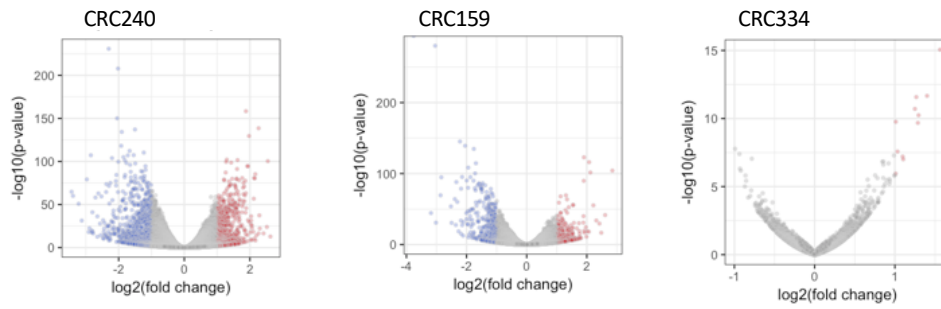

C

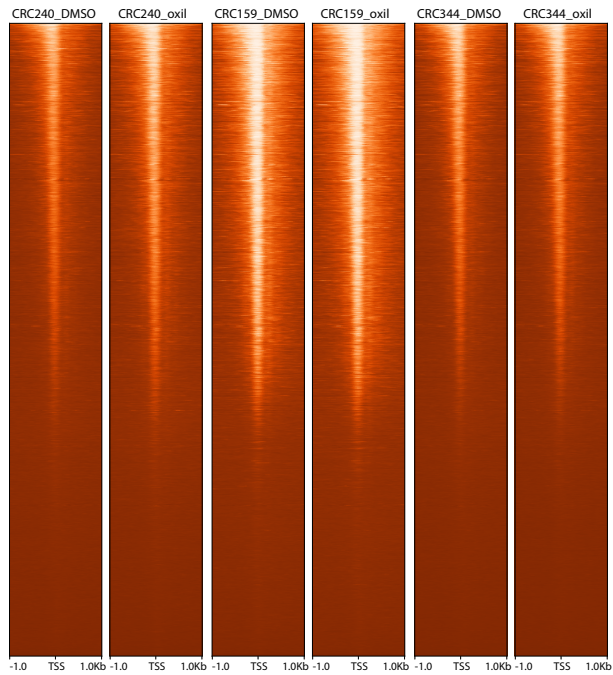

D

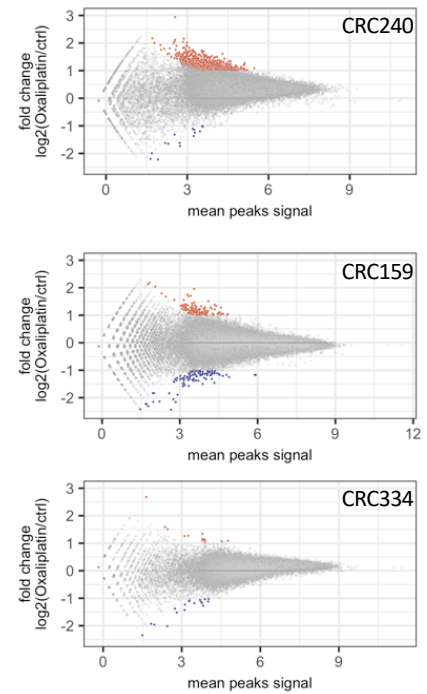

Figure S3

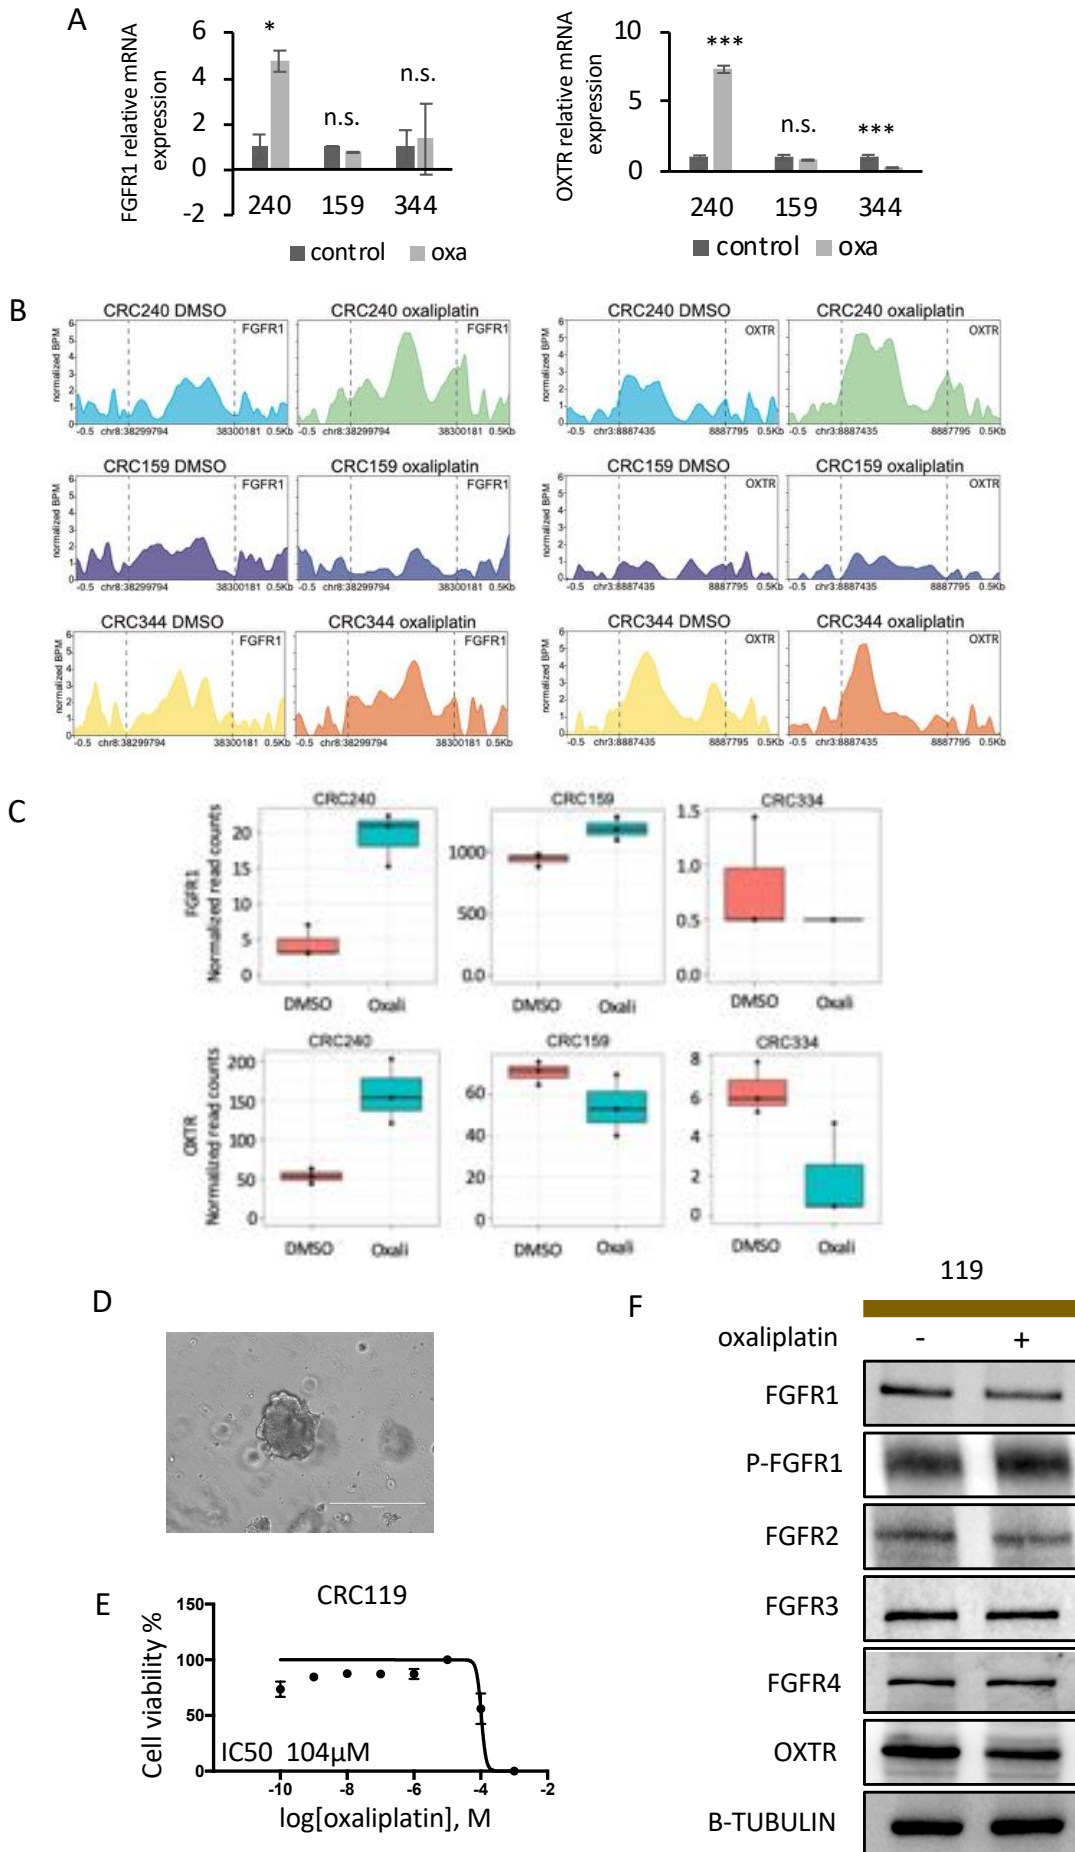

Figure S4

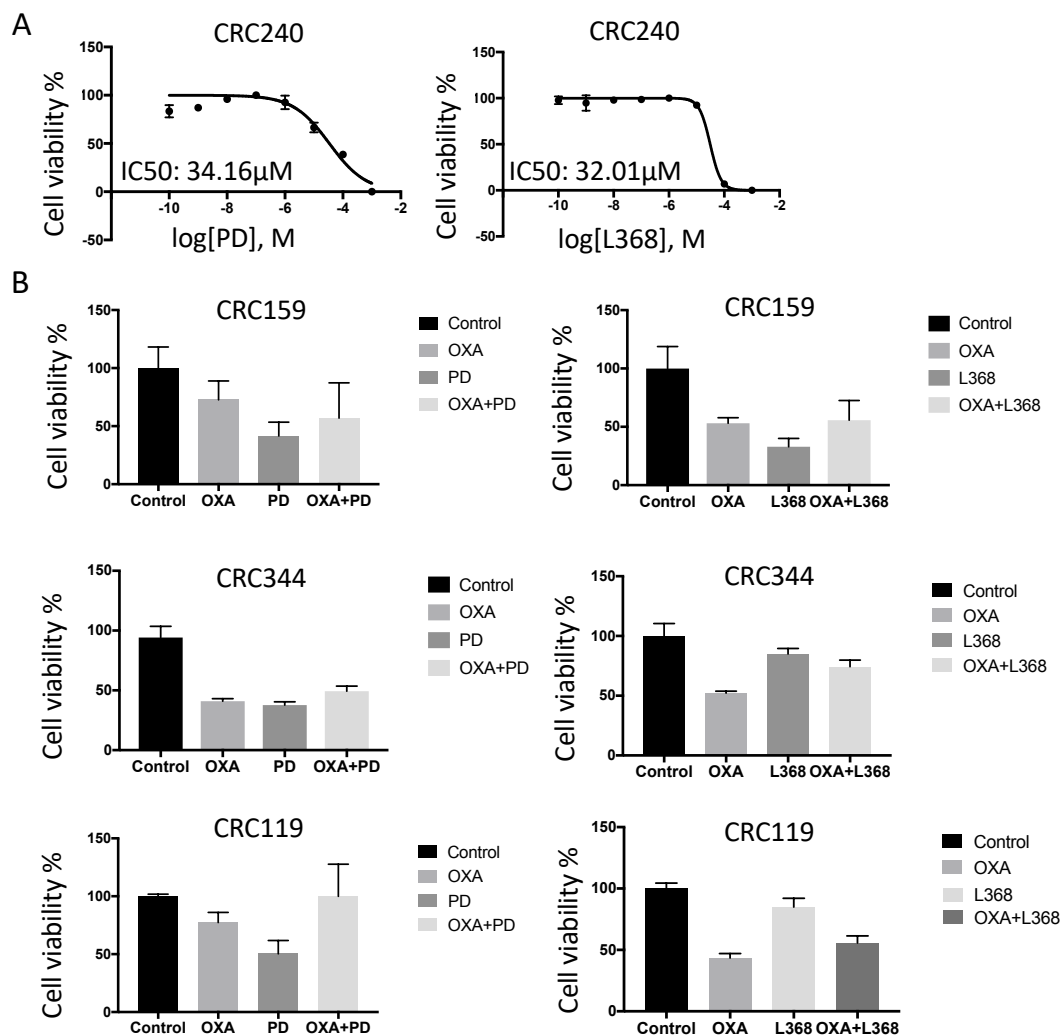

**C**

|         |     | OXA (μM) |      |      |      |      |
|---------|-----|----------|------|------|------|------|
|         |     | 32       | 64   | 128  | 255  | 510  |
| PD (μM) | 8.5 | 0.56     | 0.8  | 1.06 | 1.49 | 1.83 |
|         | 17  | 0.66     | 0.84 | 1    | 1.13 | 1.6  |
|         | 34  | 0.5      | 0.58 | 0.63 | 0.78 | 1.12 |
|         | 68  | 0.38     | 0.62 | 0.39 | 0.36 | 0.64 |
|         | 136 | 0.49     | 0.49 | 0.54 | 0.42 | 0.41 |

|           |     | OXA (μM) |      |      |      |      |
|-----------|-----|----------|------|------|------|------|
|           |     | 32       | 64   | 128  | 255  | 510  |
| L368 (μM) | 8   | 0.73     | 1.1  | 1.37 | 0.98 | 1.02 |
|           | 16  | 0.62     | 0.58 | 0.74 | 0.86 | 1.1  |
|           | 32  | 0.75     | 0.71 | 0.58 | 0.9  | 1.15 |
|           | 64  | 0.23     | 0.23 | 0.23 | 0.23 | 0.41 |
|           | 128 | 0.6      | 0.46 | 0.46 | 0.15 | 0.46 |



Figure S5

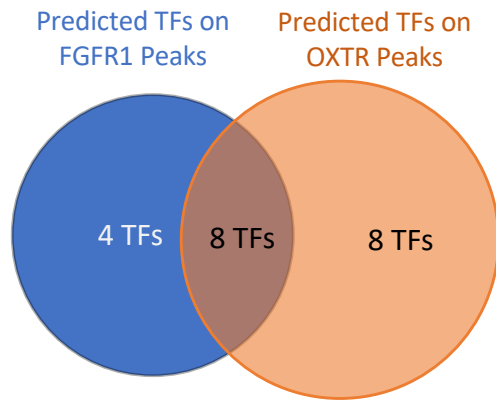

| TFs on FGFR1 Peaks | Common TFs | TFs on OXTR Peaks |
|--------------------|------------|-------------------|
| TCF-4E             | C/EBPbeta  | AP-1              |
| AP-2alpha          | YY1        | c-Jun             |
| HNF-1A             | c-Ets-1    | LEF-1             |
| XBP-1              | GR-beta    | IRF-2             |
|                    | GR-alpha   | TFIID             |
|                    | ER-alpha   | SRY               |
|                    | TFII-I     | PR B              |
|                    | FOXP3      | PR A              |

Figure S6

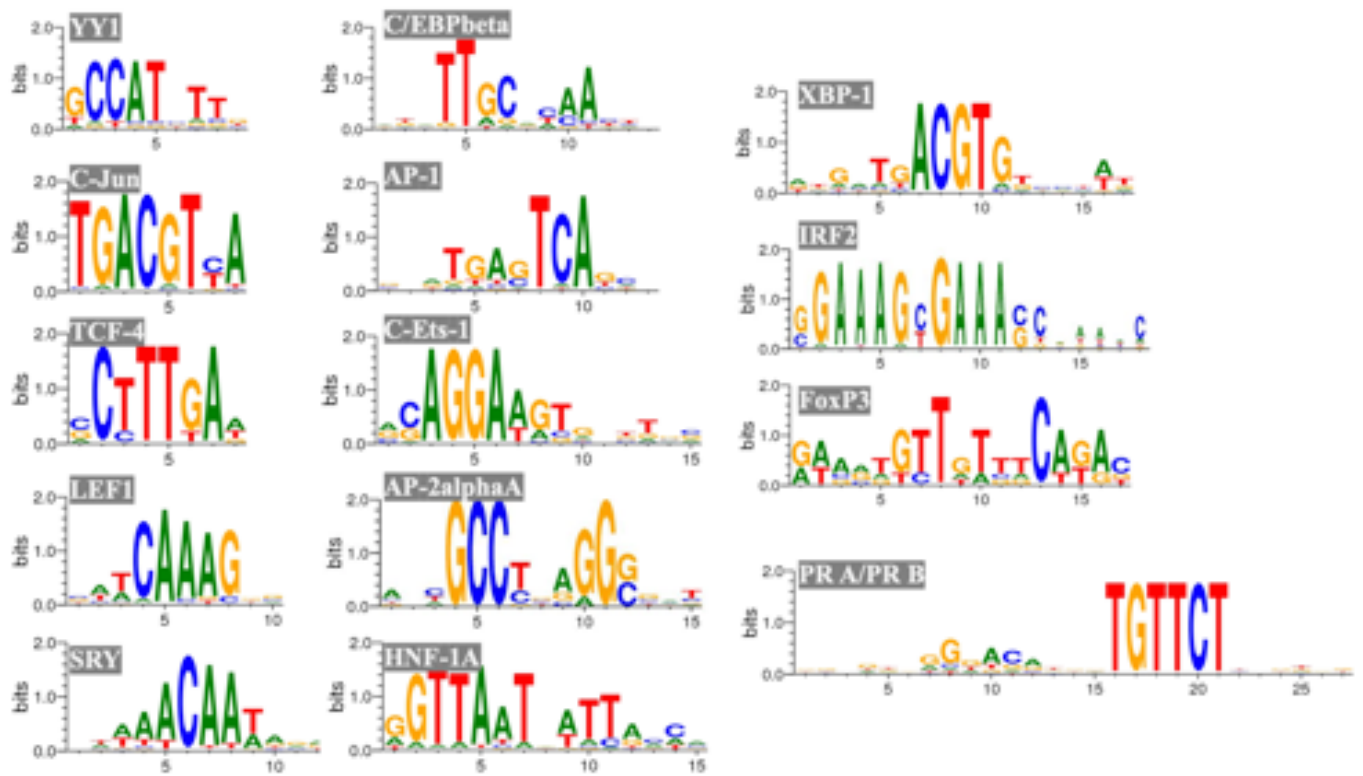

Supplement: mmc1.pdf [file mmc1.pdf]
